# Supplementary material
Source: PubMed Central journal article supplement (PMC9590487)
Supplement: 43657_2021_38_MOESM1_ESM.pdf [file 43657_2021_38_MOESM1_ESM.pdf]

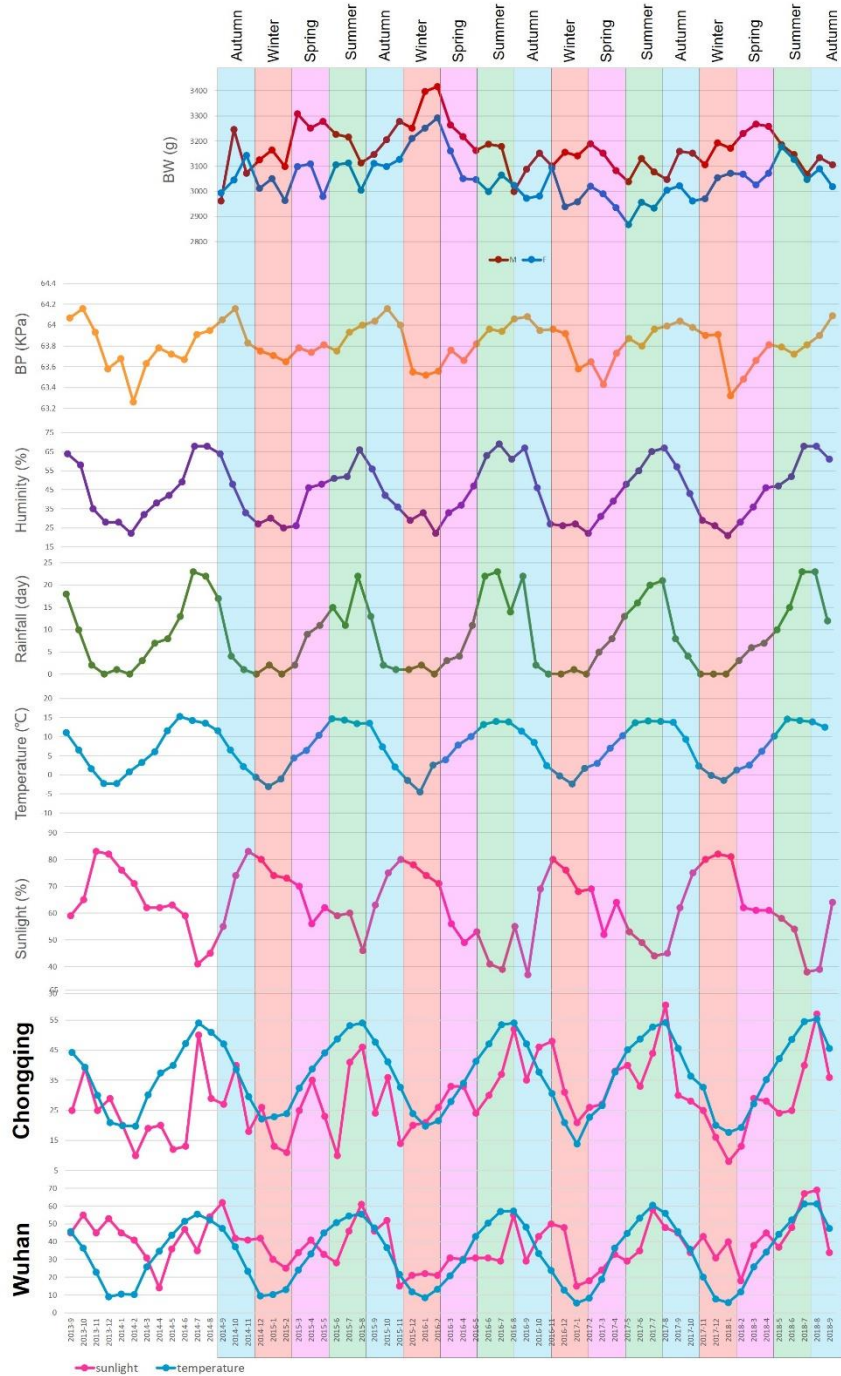

**Supplementary Fig. 1** Monthly and seasonal changes in mean birth weight (BW) and five key meteorological factors in Lhasa from 2013-September to 2018-September. A clear yearly periodicity can be observed for both BW and meteorological factors, and a non-synchronous change of sunlight contrasting the other factors can be clearly seen as a distinctive feature of high-altitude climate. Altitude and latitude: Lhasa: 3660m-29.60°N; Chongqing: 400m-29.56°N; Wuhan: 40m-30.55°N.

**Supplementary Table 1.** Birth information of Tibetans (TBN) and Han Chinese (HAN) living in Lhasa. The mean of each item is presented as average  $\pm$  SD (standard deviation).

|     |        | Sample size | Birth weight (g)     | Maternal age     | Parity          | Gestational age (days) |
|-----|--------|-------------|----------------------|------------------|-----------------|------------------------|
|     | ALL    | 8463        | 3115.67 $\pm$ 438.46 | 28.49 $\pm$ 4.82 | 1.87 $\pm$ 1.24 | 272.01 $\pm$ 8.64      |
| TBN | Male   | 4298        | 3176.03 $\pm$ 442.39 | 28.48 $\pm$ 4.82 | 1.84 $\pm$ 1.21 | 271.99 $\pm$ 8.63      |
|     | Female | 4165        | 3055.32 $\pm$ 434.53 | 28.51 $\pm$ 4.81 | 1.90 $\pm$ 1.26 | 272.02 $\pm$ 8.66      |
|     | ALL    | 455         | 2939.64 $\pm$ 424.51 | 28.86 $\pm$ 5.66 | 1.84 $\pm$ 0.98 | 272.80 $\pm$ 8.17      |
| HAN | Male   | 222         | 2956.30 $\pm$ 424.04 | 28.73 $\pm$ 5.74 | 1.86 $\pm$ 1.17 | 271.24 $\pm$ 7.55      |
|     | Female | 233         | 2922.99 $\pm$ 424.98 | 28.99 $\pm$ 5.58 | 1.82 $\pm$ 0.79 | 274.35 $\pm$ 8.79      |

**Supplementary Table 2.** Mean birth weight by month and season of birth after adjusted by maternal age, gestational age and parity. The data is visualized in Fig. 1A and 2A. adjAVG: adjusted average; SD: standard deviation.

| Month | Male    |        | Female  |        | Season | Male    |        | Female  |        |
|-------|---------|--------|---------|--------|--------|---------|--------|---------|--------|
|       | adjAVG  | SD     | adjAVG  | SD     |        | adjAVG  | SD     | adjAVG  | SD     |
| Mar   | 3262.78 | 430.98 | 3097.29 | 424.44 |        |         |        |         |        |
| Apr   | 3222.21 | 445.65 | 3051.44 | 447.30 | Spring | 3213.66 | 436.90 | 3077.54 | 436.49 |
| May   | 3152.54 | 430.59 | 3081.39 | 437.59 |        |         |        |         |        |
| Jun   | 3166.37 | 420.57 | 3049.39 | 441.89 |        |         |        |         |        |
| Jul   | 3112.69 | 417.27 | 3035.08 | 386.01 | Summer | 3120.09 | 425.32 | 3046.06 | 415.13 |
| Aug   | 3080.88 | 433.63 | 3051.99 | 416.19 |        |         |        |         |        |
| Sep   | 3145.90 | 440.82 | 3035.29 | 434.90 |        |         |        |         |        |
| Oct   | 3163.81 | 428.22 | 2991.29 | 425.39 | Autumn | 3145.95 | 444.57 | 3025.08 | 435.95 |
| Nov   | 3130.61 | 461.50 | 3047.85 | 446.95 |        |         |        |         |        |
| Dec   | 3179.21 | 454.91 | 3007.59 | 427.10 |        |         |        |         |        |
| Jan   | 3240.35 | 451.05 | 3124.87 | 460.10 | Winter | 3257.91 | 453.79 | 3107.19 | 446.84 |
| Feb   | 3320.61 | 455.07 | 3151.96 | 453.29 |        |         |        |         |        |

**Supplementary Table 3.** Birth weight and reduction comparison among lowlanders (SHH: Shanghai Han Chinese), and those living at high altitude (LST: Lhasa Tibetans; LSH: Lhasa Han Chinese). The reductions and its proportions are indicated as  $\Delta$  and %. A more BW reduction and depletion of BW sex difference in males than in females is observed. M-male; F-female.

| <b>BW (g)</b>                       | <b>M</b>     | <b>F</b>     | <b><math>\Delta</math>(M-F)</b> |
|-------------------------------------|--------------|--------------|---------------------------------|
| <b>SHH</b>                          | 3436         | 3319         | 117                             |
| <b>LST</b>                          | 3176         | 3055         | 121                             |
| <b>LSH</b>                          | 2956         | 2923         | 33                              |
| <b><math>\Delta</math>(SHH-LST)</b> | 260 (7.57%)  | 264 (7.95%)  | 4 (0.39%)                       |
| <b><math>\Delta</math>(SHH-LSH)</b> | 480 (13.97%) | 396 (11.93%) | 84 (2.04%)                      |
| <b><math>\Delta</math>(LST-LSH)</b> | 220 (6.93%)  | 132 (4.32%)  | 88 (72.73%)                     |

**Supplementary Table 4.** Statistics of low-BW prevalence and sex ratio in highlanders and lowlanders. A higher low-BW frequency in males than in females, and lower male counts than females in Han Chinese living at high altitude is observed. M-male; F-female.

| <b>Counts</b>           | <b>SHH</b>  | <b>LST</b>  | <b>LSH</b>  |
|-------------------------|-------------|-------------|-------------|
| <b>All</b>              | 3436        | 4298        | 222         |
| <b>M</b>                |             |             |             |
| <b>Low-BW</b>           | 44          | 237         | 29          |
| <b>Low-BW ratio</b>     | 0.01        | 0.06        | 0.13        |
| <b>F</b>                |             |             |             |
| <b>Low-BW</b>           | 70          | 384         | 33          |
| <b>Low-BW ratio</b>     | 0.02        | 0.09        | 0.14        |
| <b>M/F Low-BW ratio</b> | <b>0.61</b> | <b>0.60</b> | <b>0.92</b> |
| <b>M/F ratio</b>        | <b>1.04</b> | <b>1.03</b> | <b>0.95</b> |
